# Supplementary material
Source: JCI journal article supplement (doi:10.1172/jci148881)
Supplement: sd1 [file 1]

## Supplemental data

Figure S1. Study outline and cross-sectional blood samples of kidney transplant patients

Figure S2. Flow cytometry analyses of blood B cells

Figure S3. SPADE cluster distribution across the patients' groups

Figure S4. Flow cytometry analyses of T-bet expression in blood B cell subsets

Figure S5. Flow cytometry analyses of MBCs subsets

Figure S6. Gating strategy for sorting naive B cells, MBCs and cT<sub>FH</sub> cells

Figure S7. Transcriptional profiling of AM and TLM subsets in kidney transplant patients

Figure S8. Analysis of B cell phenotypes induced after B cell activation *in vitro*

Figure S9. Analysis of B cell phenotypes induced after B cell activation with different cytokines *in vitro*

Figure S10. Correlation of frequencies of MBC subsets with disease manifestations of ABMR

Figure S11. Dynamics of IgD, IL-21R and T-bet expression of AM subset, and correlation with timing to ABMR onset post-transplant

Figure S12. High-dimensional flow cytometry analyses of MBCs in individual patients

Figure S13. AM cells within kidney allografts of different patient groups

Figure S14. Molecular signatures of AM subsets within kidney allografts of patients

Table S1. Patients demographics (blood samples)

Table S2. Assay table and sample sizes

Table S3. Memory B cell clusters and phenotypic patterns

Table S4. GO pathways significantly upregulated in AM versus RM subset in DSA+ABMR+ group

Table S5. GO pathways significantly upregulated in TLM versus RM subset in  
DSA+ABMR+ group

Table S6. VH germ line genes differentially expressed in blood and allografts of  
DSA+ABMR- versus DSA- group

Table S7. Patients demographics (allograft biopsy samples)

Table S8. Antibodies for flow cytometry

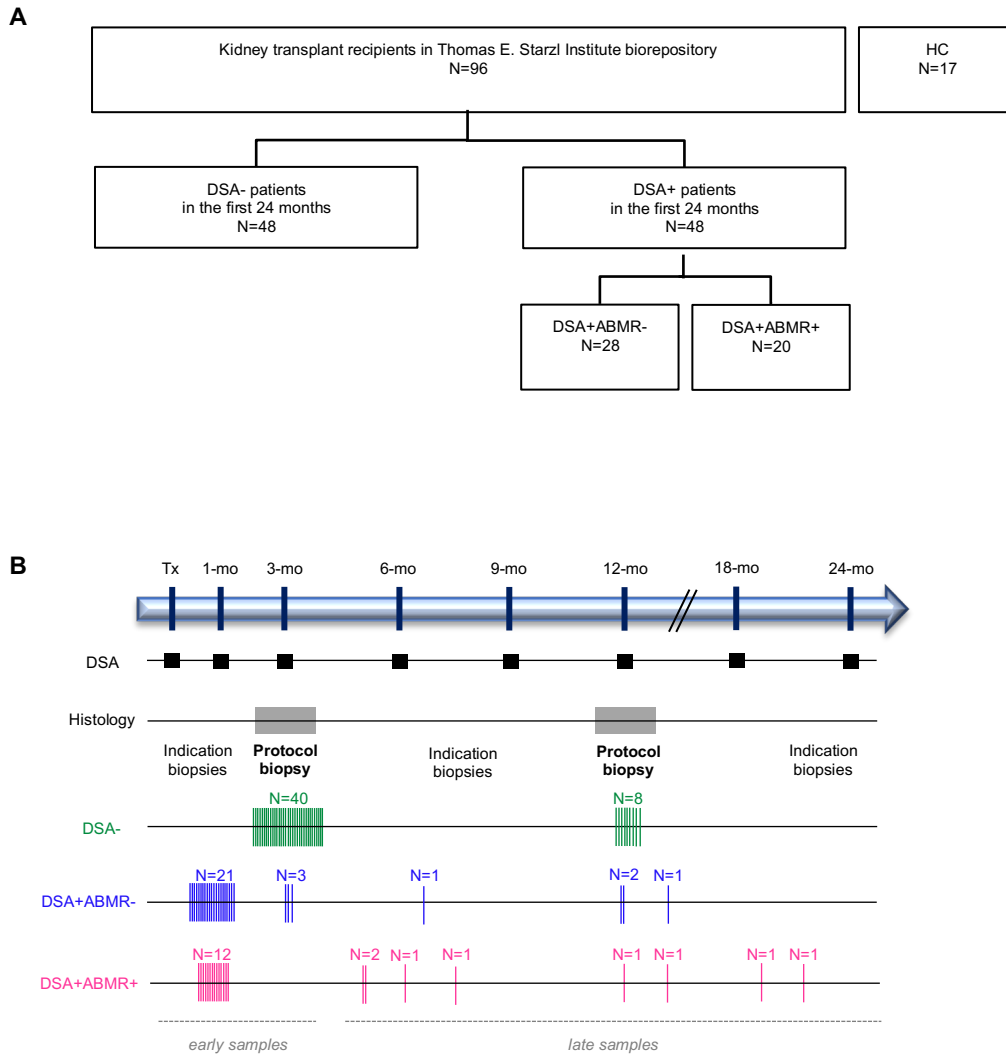

**Figure S1. Study outline and cross-sectional blood samples of kidney transplant patients**

**(A)** Study design. Identification of three groups of patients according to the presence of post-transplant DSA and biopsy-proven ABMR status in the first 24 months post-transplant: patients without DSA nor ABMR (DSA-), patients with DSA without ABMR (DSA+ABMR-) and patients with DSA and ABMR (DSA+ABMR+). HC (healthy control) subjects served as control group. **(B)** Schematic representation of the screening strategy of patients for circulating DSAs; at 1-, 3-, 6-, 9-, 12-, 18- and 24-month post-transplant and at the time of indication biopsies. ABMR was detected by kidney allograft protocol and indication biopsies. Cross-sectional time points of blood samples are represented by vertical colored bars. Early samples are defined by samples collected  $\leq 3$ -month and late samples are those collected  $>3$ -month post-transplant.

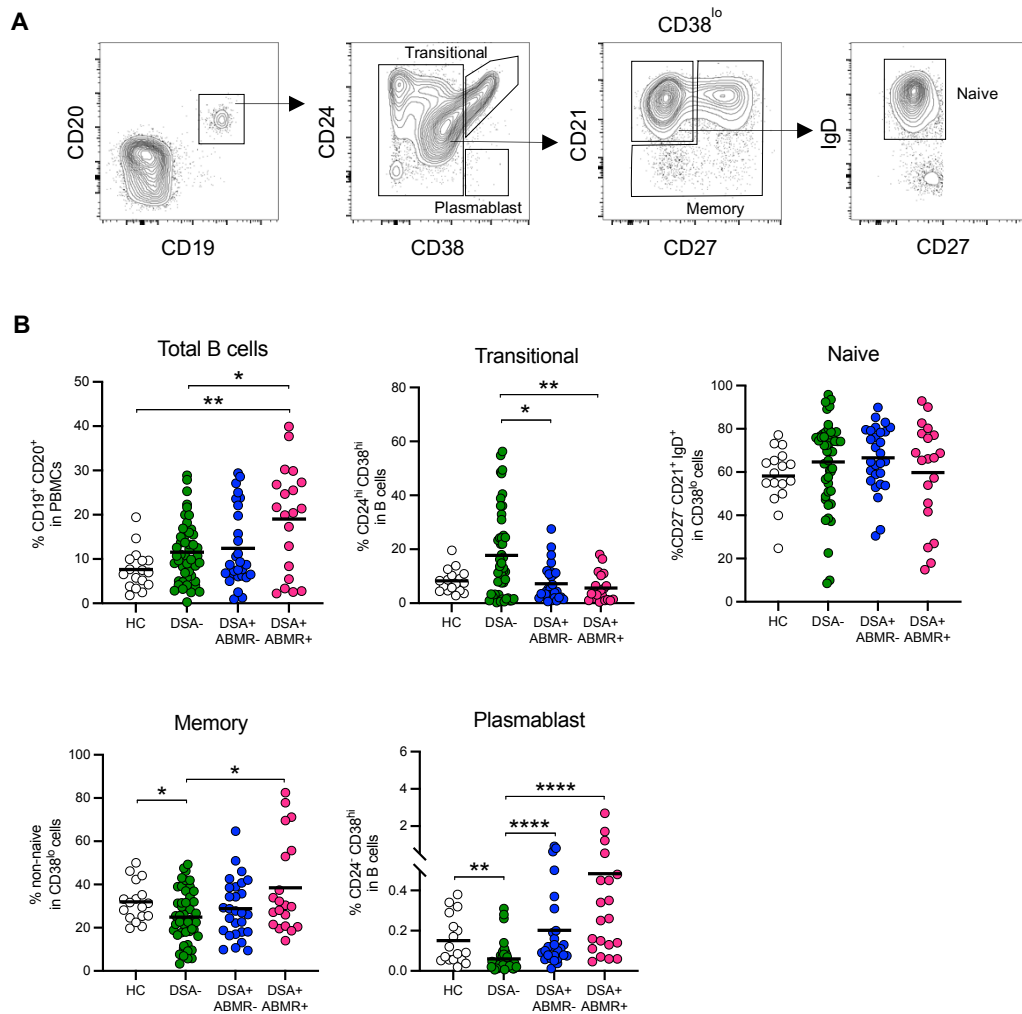

**Figure S2. Flow cytometry analyses of blood B cells**

(A) Representative example of the gating strategy by flow cytometry and (B) dot plots of percentages of total B cells (CD19<sup>+</sup>CD20<sup>+</sup>), transitional (CD24<sup>hi</sup>CD38<sup>hi</sup>), naive (CD38<sup>lo</sup>CD27<sup>-</sup>CD21<sup>+</sup>IgD<sup>+</sup>), MBCs (non-naive CD38<sup>lo</sup>) and plasmablasts (CD24<sup>-</sup>CD38<sup>hi</sup>) are displayed; HC (N=17), DSA- (N=48), DSA+ABMR- (N=28) and DSA+ABMR+ (N=20) patients. Kruskal-Wallis with Dunn's post-test. \*P < 0.05; \*\*P < 0.01; \*\*\*\*P < 0.0001. Each dot represents one subject and horizontal lines are mean values.

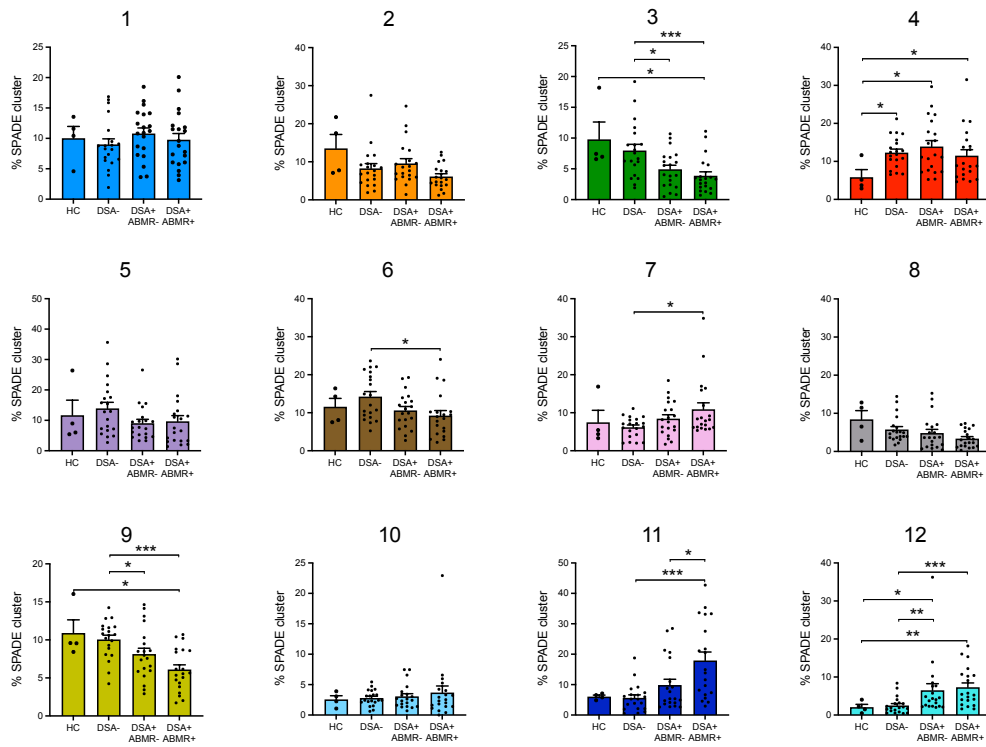

**Figure S3. SPADE cluster distribution across the patients' groups**

Bar plot showing MBC clusters' distribution based on SPADE clustering as in panel 1C. Kruskal-Wallis with Dunn's post-test. \* $P < 0.05$ ; \*\* $P < 0.01$ ; \*\*\* $P < 0.001$ . Each dot represents one subject and horizontal lines are mean values  $\pm$  SEM.

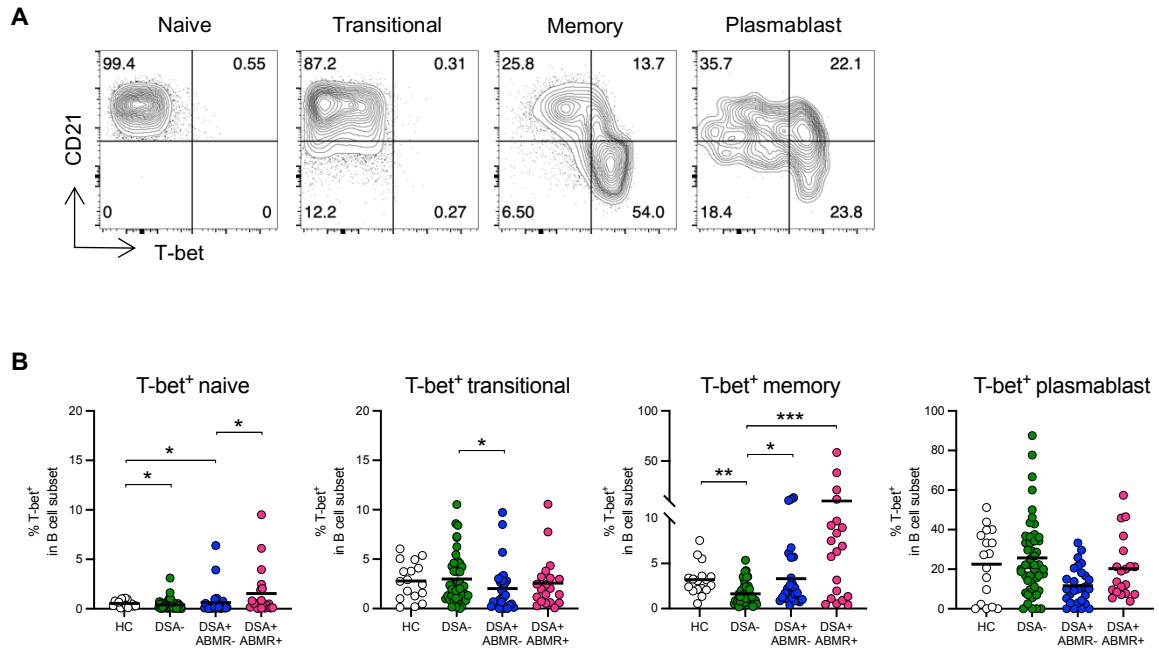

**Figure S4. Flow cytometry analyses of T-bet expression in blood B cell subsets**

(A) Representative examples of flow cytometry analysis and (B) dot plots of percentages of T-bet<sup>+</sup> cells in naive, transitional, MBCs and plasmablasts are displayed; HC (N=17), DSA- (N=48), DSA+ABMR- (N=28) and DSA+ABMR+ (N=20) patients. Kruskal-Wallis with Dunn's post-test. \*P < 0.05; \*\*P < 0.01; \*\*\*P < 0.001. Each dot represents one subject and horizontal lines are mean values.

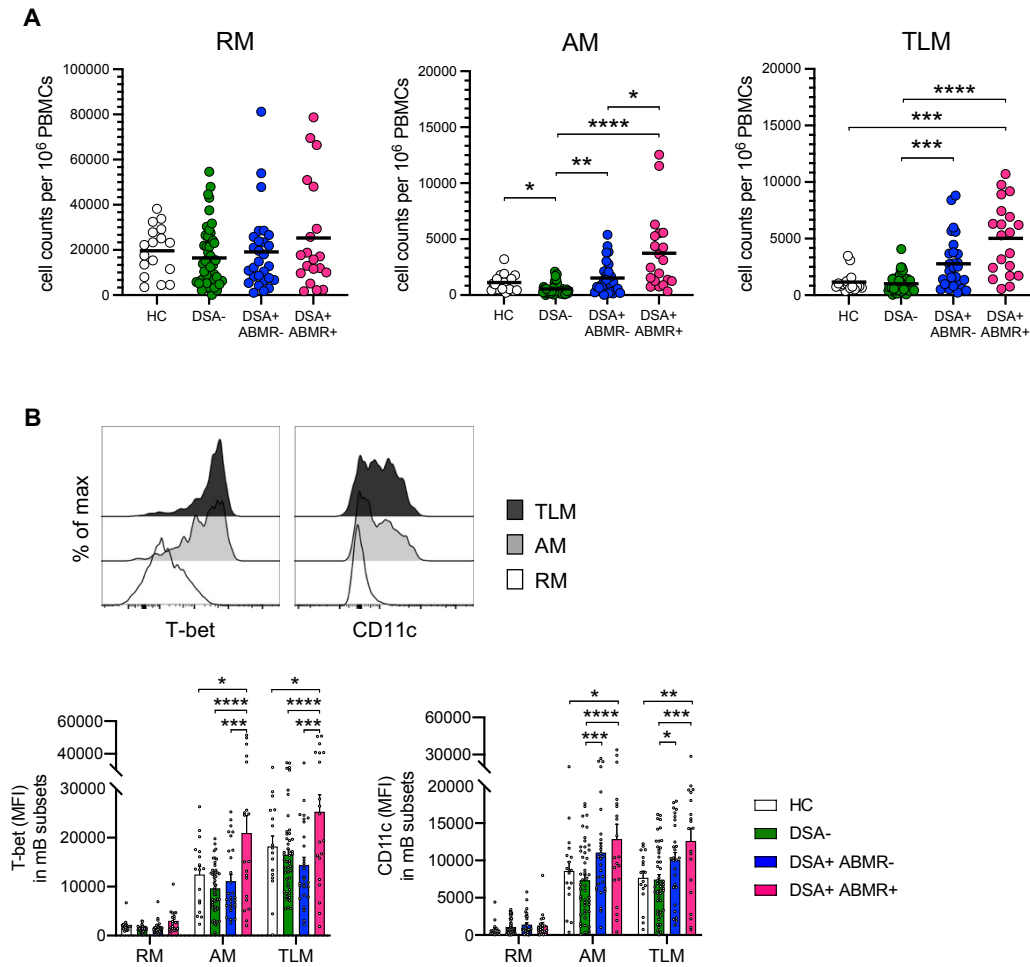

**Figure S5. Flow cytometry analyses of MBCs subsets**

(A) Dot plots of resting memory ( $CD27^+CD21^+$ , RM), activated memory ( $CD27^+CD21^-$ , AM) and tissue-like memory ( $CD27^-CD21^-$ , TLM) subsets, as cell counts per million PBMCs by flow cytometry are displayed; HC (N=17), DSA- (N=48), DSA+ABMR- (N=28) and DSA+ABMR+ (N=20) patients. (B) Representative examples of flow cytometry histograms and bar plots of MFI values of T-bet and CD11c in RM, AM and TLM subsets are displayed. Sample sizes as in panel A. Kruskal-Wallis with Dunn's post-test for panel A. Repeated measures two-way ANOVA with Tukey correction for panel B. \* $P < 0.05$ ; \*\* $P < 0.01$ ; \*\*\* $P < 0.001$ ; \*\*\*\* $P < 0.0001$ . Each dot represents one subject and horizontal lines are mean values  $\pm$  SEM.

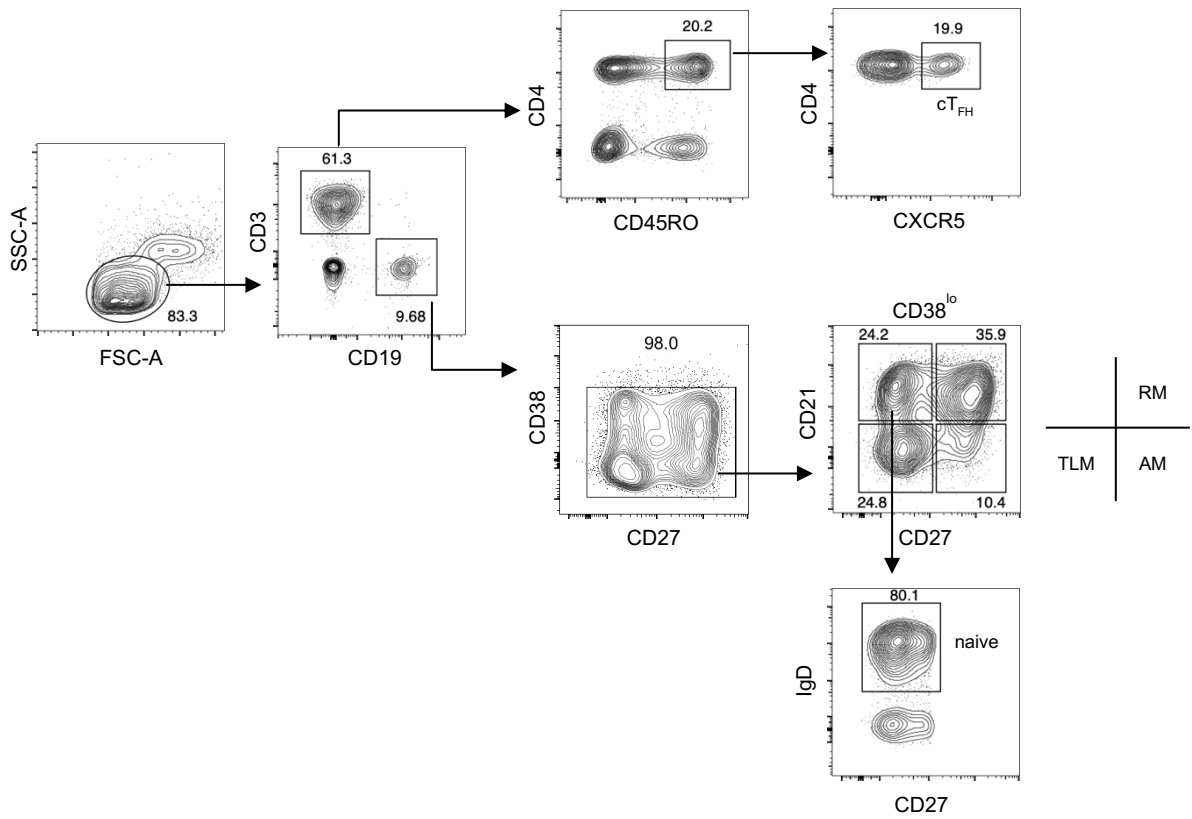

**Figure S6. Gating strategy for sorting naive B cells, MBCs and cT<sub>FH</sub> cells**

Representative example of the gating strategy for FACS sorting of naive (CD19<sup>+</sup>CD3<sup>-</sup>CD38<sup>lo</sup>CD27<sup>-</sup>CD21<sup>+</sup>IgD<sup>+</sup>) B cells, RM (CD19<sup>+</sup>CD3<sup>-</sup>CD38<sup>lo</sup>CD27<sup>+</sup>CD21<sup>+</sup>), AM (CD19<sup>+</sup>CD3<sup>-</sup>CD38<sup>lo</sup>CD27<sup>+</sup>CD21<sup>-</sup>), TLM (CD19<sup>+</sup>CD3<sup>-</sup>CD38<sup>lo</sup>CD27<sup>-</sup>CD21<sup>-</sup>) and cT<sub>FH</sub> (CD19<sup>-</sup>CD3<sup>+</sup>CD4<sup>+</sup>CD45RO<sup>+</sup>CXCR5<sup>+</sup>) cells from PBMC samples.

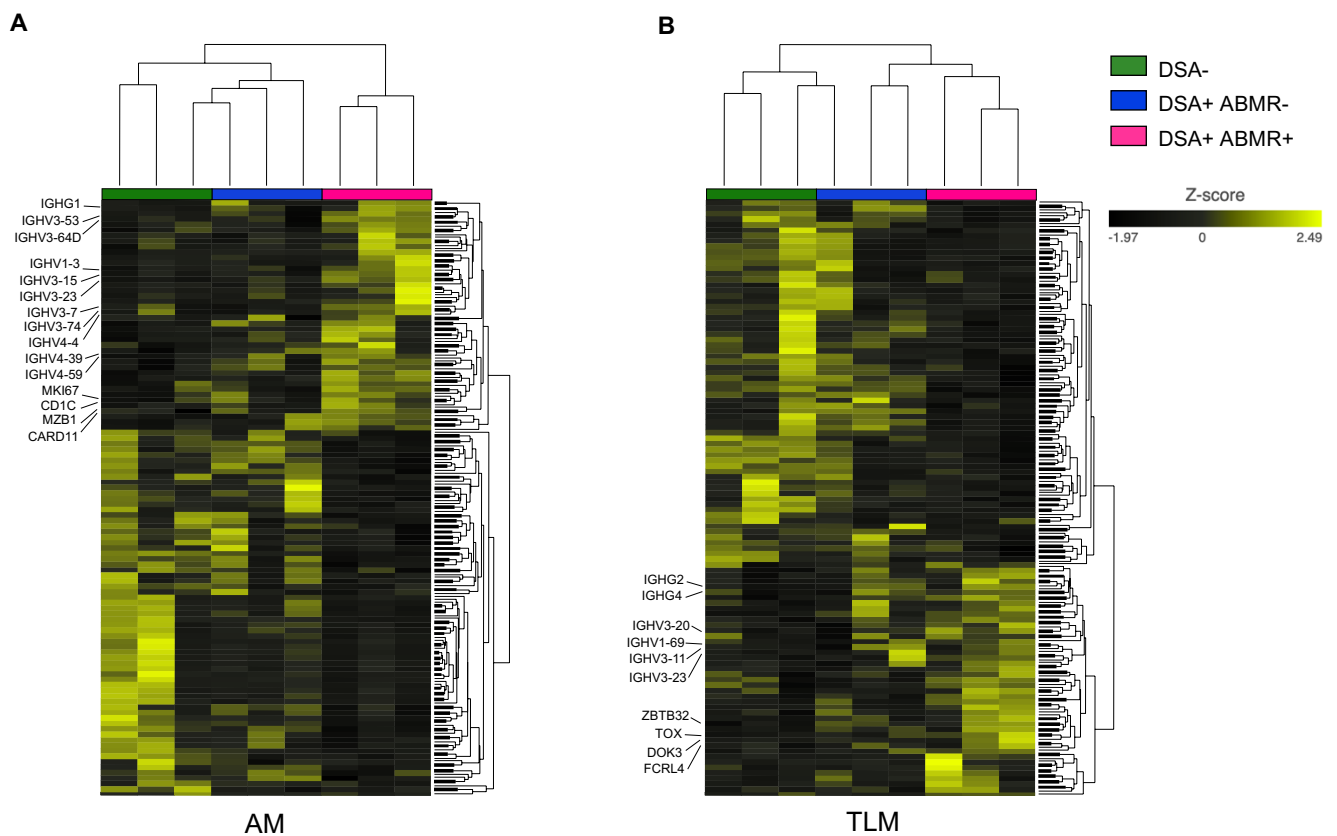

**Figure S7. Transcriptional profiling of AM and TLM subsets in kidney transplant patients**

RNA-seq analysis of AM and TLM subsets was performed in three patients per group; DSA- (N=3), DSA+ABMR- (N=3) and DSA+ABMR+ (N=3). Heatmaps generated by hierarchical clustering of genes and the three types of patient samples for AM (**A**) and TLM (**B**) subsets are displayed. Genes used for clustering were differentially expressed (fold change >1.5, false discovery rate P-Value <0.10).

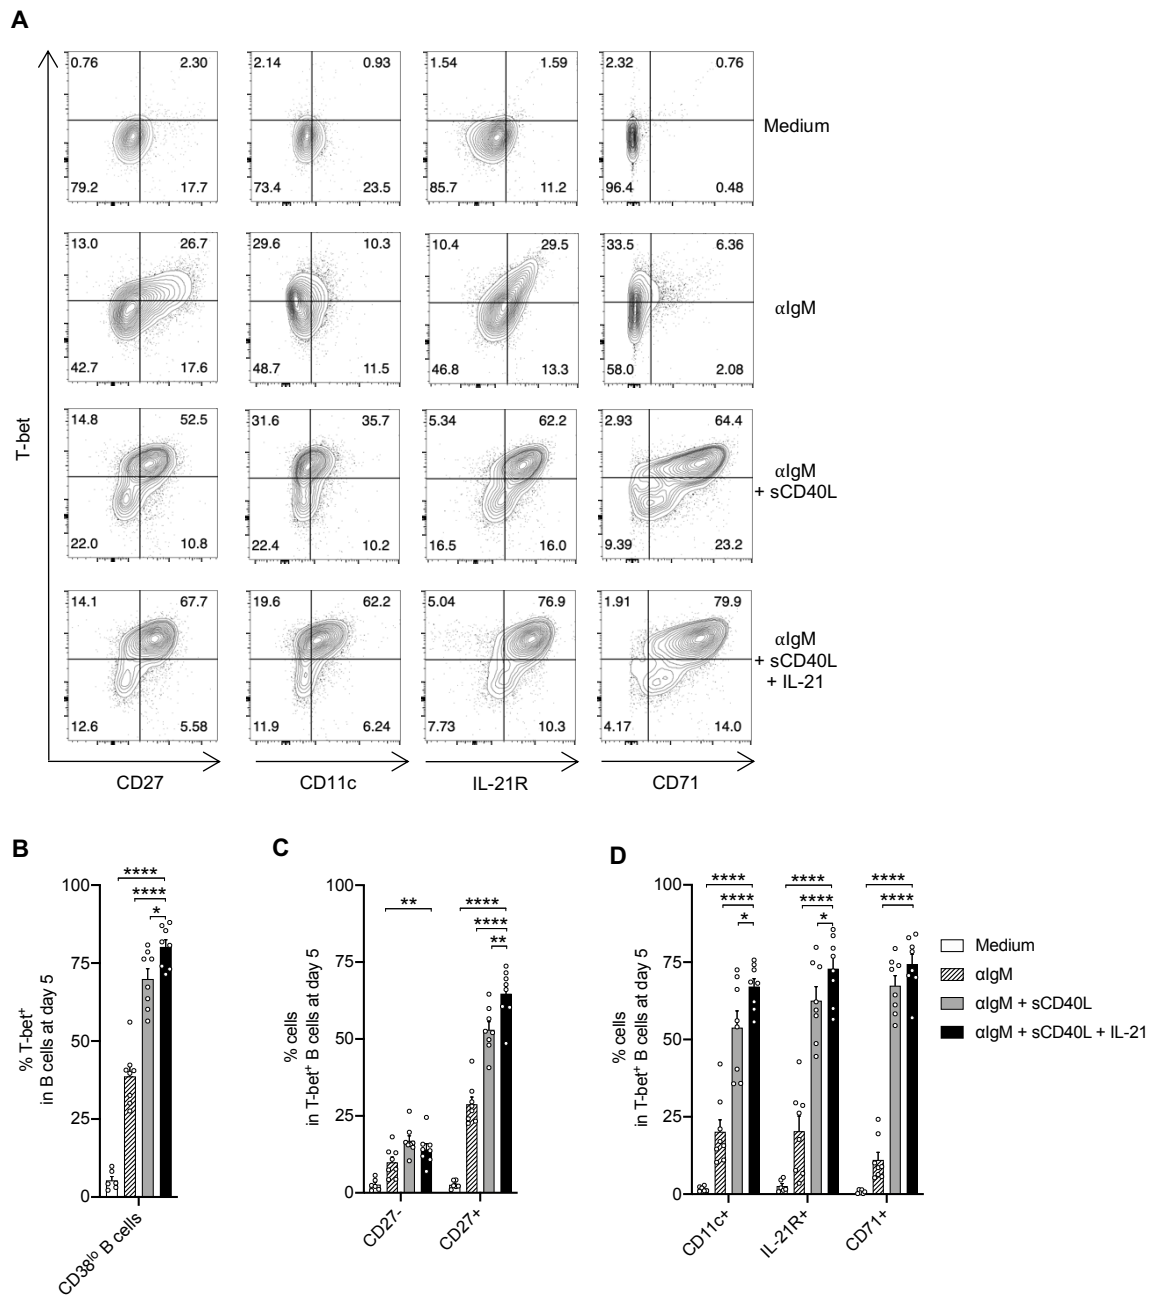

**Figure S8. Analysis of B cell phenotypes induced after B cell activation *in vitro***

Naive (CD19<sup>+</sup>CD3<sup>-</sup>CD38<sup>lo</sup>CD27<sup>-</sup>CD21<sup>+</sup>IgD<sup>+</sup>) B cells were sorted from PBMCs of HC (N=8) and were activated with a combination of stimulators for 5 days. **(A)** Representative example of flow cytometry analysis of B cells after 5 days of culture after excluding CD38<sup>hi</sup> B cells. **(B)** Bar plots of percentages of T-bet<sup>+</sup> cells in CD38<sup>lo</sup> B cells, **(C)** CD27<sup>-</sup> and CD27<sup>+</sup> cells in T-bet<sup>+</sup> B cells, **(D)** CD11c<sup>+</sup>, IL-21R<sup>+</sup> and CD71<sup>+</sup> cells in T-bet<sup>+</sup> B cells after 5 days of culture, in each indicated stimulatory condition, are displayed. Multiple t-test with Holm-Sidak correction for panel **B**, **C** and **D**. \*P < 0.05; \*\*P < 0.01; \*\*\*\*P < 0.0001. Each dot represents one subject and horizontal lines of bars are mean values ± SEM.

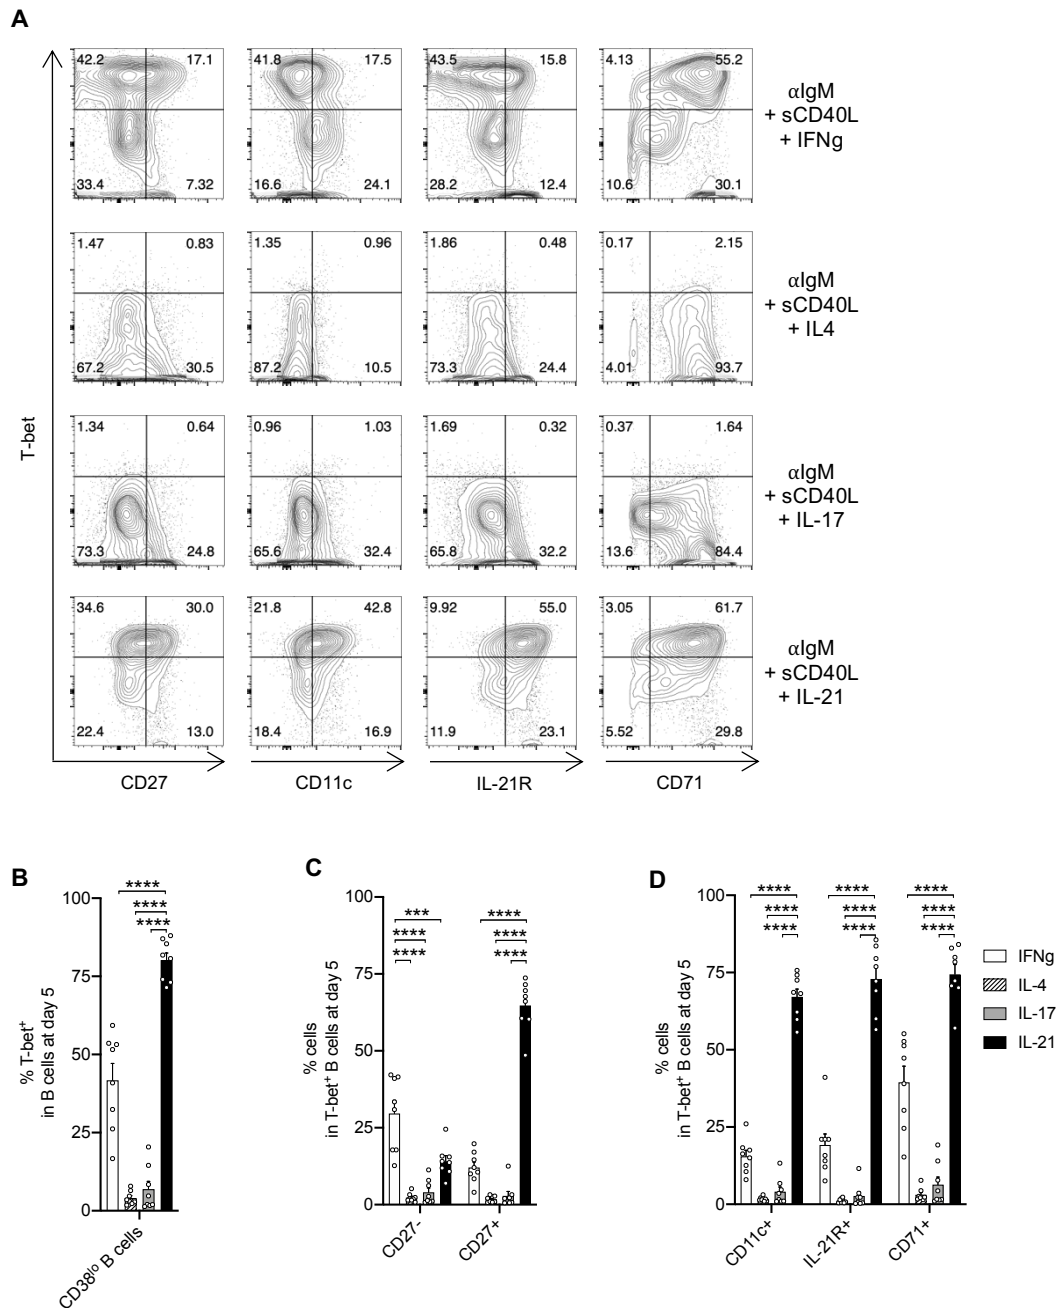

**Figure S9. Analysis of B cell phenotypes induced after B cell activation with different cytokines *in vitro***

Naive ( $CD19^+CD3^-CD38^{lo}CD27^-CD21^+IgD^+$ ) B cells were sorted from PBMCs of HC (N=8) and activated with a combination of cytokine cocktails for 5 days. **(A)** Representative example of flow cytometry analysis of B cells after 5 days of culture after excluding  $CD38^{hi}$  B cells. **(B)** Bar plots of percentages of T-bet $^+$  cells in  $CD38^{lo}$  B cells, **(C)**  $CD27^-$  and  $CD27^+$  cells in T-bet $^+$  B cells, **(D)**  $CD11c^+$ ,  $IL-21R^+$  and  $CD71^+$  cells in T-bet $^+$  B cells after 5 days of culture, in each indicated stimulatory condition, are displayed. Multiple t-test with Holm-Sidak correction for panel **B**, **C** and **D**. \*\*\* $P < 0.001$ ; \*\*\*\* $P < 0.0001$ . Each dot represents one subject and horizontal lines of bars are mean values  $\pm$  SEM.

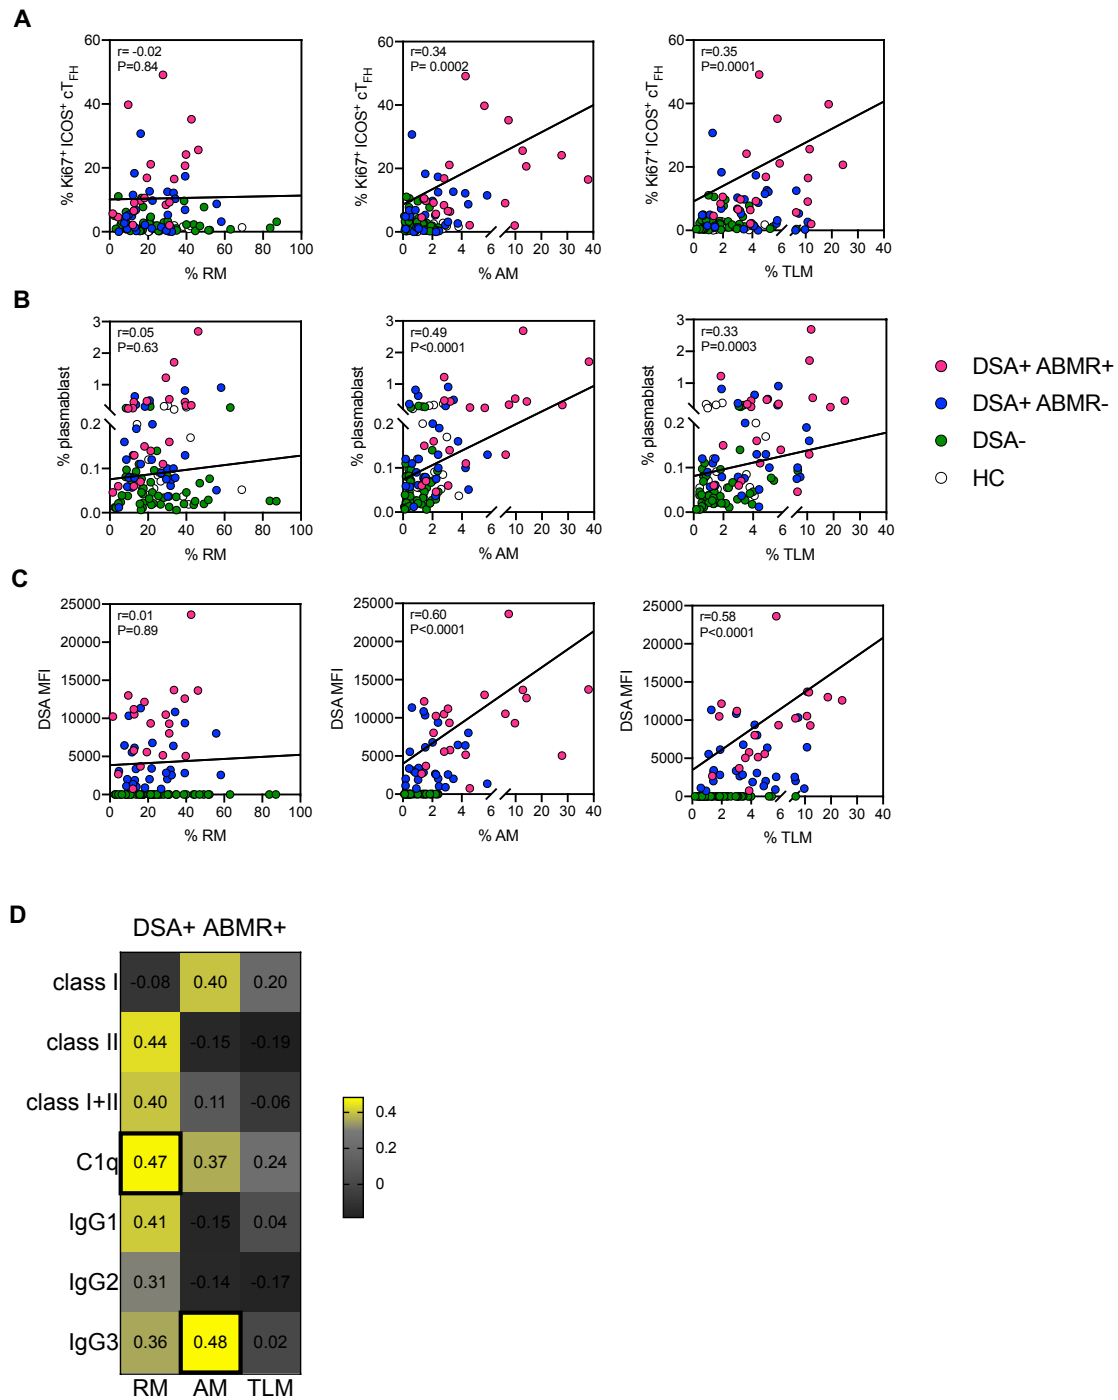

**Figure S10. Correlation of frequencies of MBC subsets with disease manifestations of ABMR**

Spearman correlation analysis of percentages of RM, AM and TLM subsets with percentages of blood (A) Ki67<sup>+</sup>ICOS<sup>+</sup> cT<sub>FH</sub> (CD3<sup>+</sup>CD4<sup>+</sup>CD45RO<sup>+</sup>CXCR5<sup>+</sup>) cells, (B) plasmablasts (CD19<sup>+</sup>CD24<sup>+</sup>CD38<sup>hi</sup>) and (C) DSA MFI levels measured in serum by Luminex, are displayed; HC (N=17), DSA- (N=48), DSA+ABMR- (N=28) and DSA+ABMR+ (N=20). (D) Heatmap

showing Spearman correlation coefficients of percentages of RM, AM and TLM subsets with MFI levels of: class I, class II, sum of class I plus II, C1q-binding and IgG subclasses of DSAs measured in serum from DSA+ABMR+ patients, by Luminex. Bold squares indicate correlations with  $P < 0.05$ . DSA class I and II analyses were performed for  $N=20$ , DSA IgG subclass analysis was performed for  $N=18$  and DSA C1q-binding analysis was performed for  $N=19$  patients.

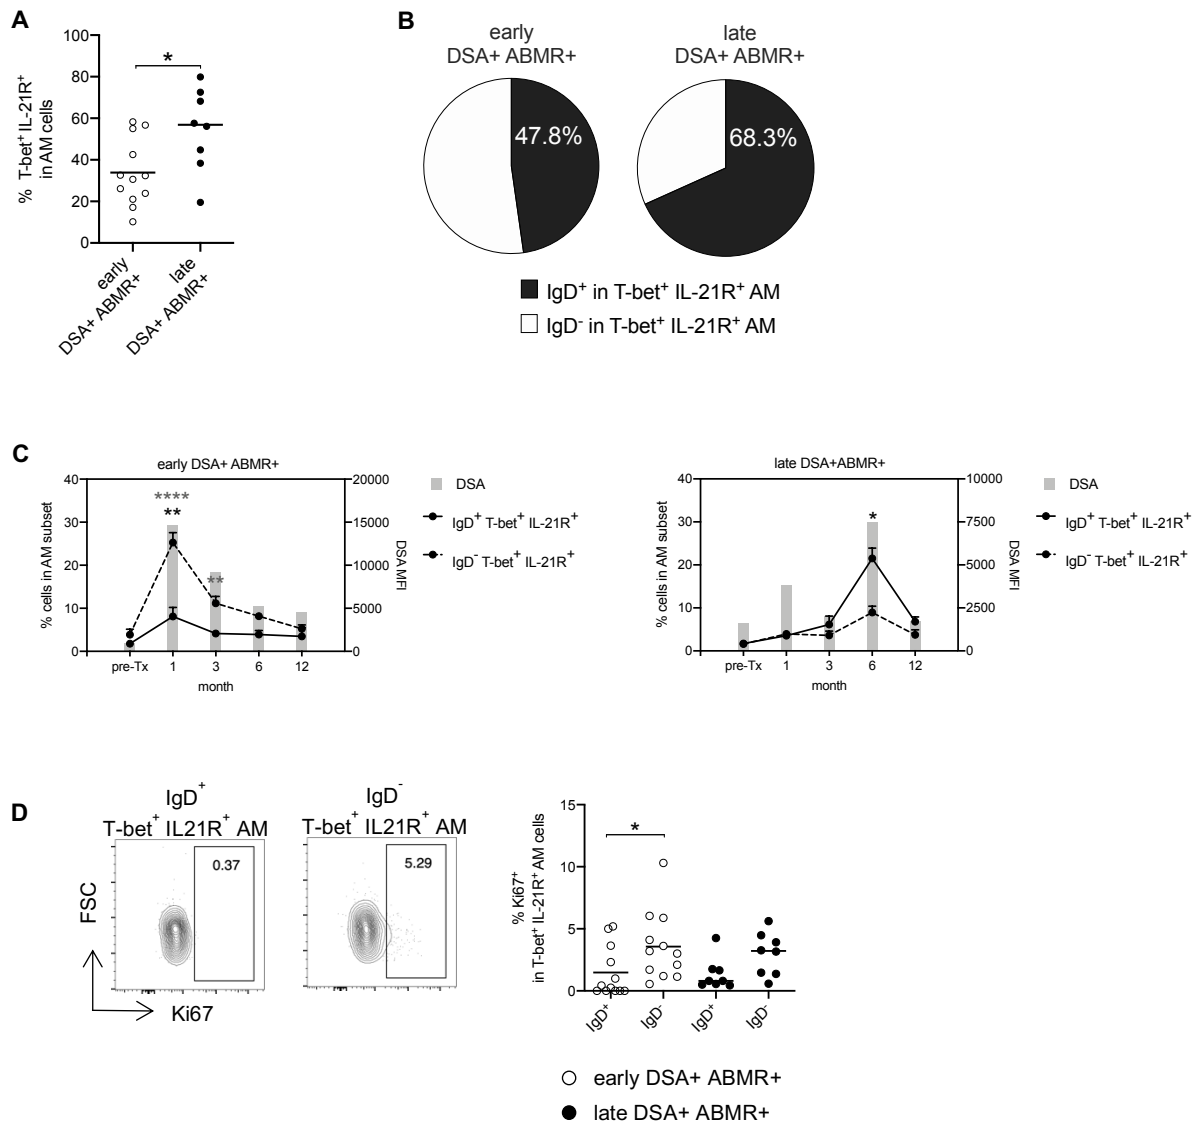

**Figure S11. Dynamics of IgD, IL-21R and T-bet expression of AM subset, and correlation with timing to ABMR onset post-transplant**

(A) Dot plot of percentages of T-bet<sup>+</sup> IL-21R<sup>+</sup> cells in AM cells, according to early (before 3-month) or late (after 3-month post-transplant) ABMR occurrence are displayed; early DSA+ABMR+ (N=12) and late DSA+ABMR+ (N=8) patients. (B) Pie charts of percentages of IgD<sup>+</sup> and IgD<sup>-</sup> cells in T-bet<sup>+</sup> IL-21R<sup>+</sup> AM cells are displayed; sample sizes as in panel A. (C) Patients were sampled longitudinally from pre-transplant to the indicated intervals in post-transplant. Kinetics of emergence of IgD<sup>+</sup> (bold connecting lines) and IgD<sup>-</sup> (dashed connecting lines) T-bet<sup>+</sup> IL-21R<sup>+</sup> in AM cells, and DSAs (grey bars) are displayed; early DSA+ABMR+ (N=3) and late DSA+ABMR+ (N=2) patients. Mixed-effects model for comparison of IgD<sup>+</sup> or IgD<sup>-</sup> T-bet<sup>+</sup> IL-21R<sup>+</sup> AM cells between time points. IgD<sup>+</sup> or IgD<sup>-</sup> T-bet<sup>+</sup> IL-21R<sup>+</sup> AM cell data

are shown as  $\% \pm \text{SEM}$  and DSA bars represent mean values. **(D)** Representative examples of flow cytometry analysis and dot plot of percentages of Ki67<sup>+</sup> in IgD<sup>+</sup> or IgD<sup>-</sup> T-bet<sup>+</sup> IL-21R<sup>+</sup> AM cells, according to early or late ABMR occurrence are displayed; sample sizes as in panel **A**. Mann-Whitney U test for panel **A** and Wilcoxon matched-pairs signed rank test for panel **D**. \*P < 0.05. Each dot represents one subject and horizontal lines are mean values.

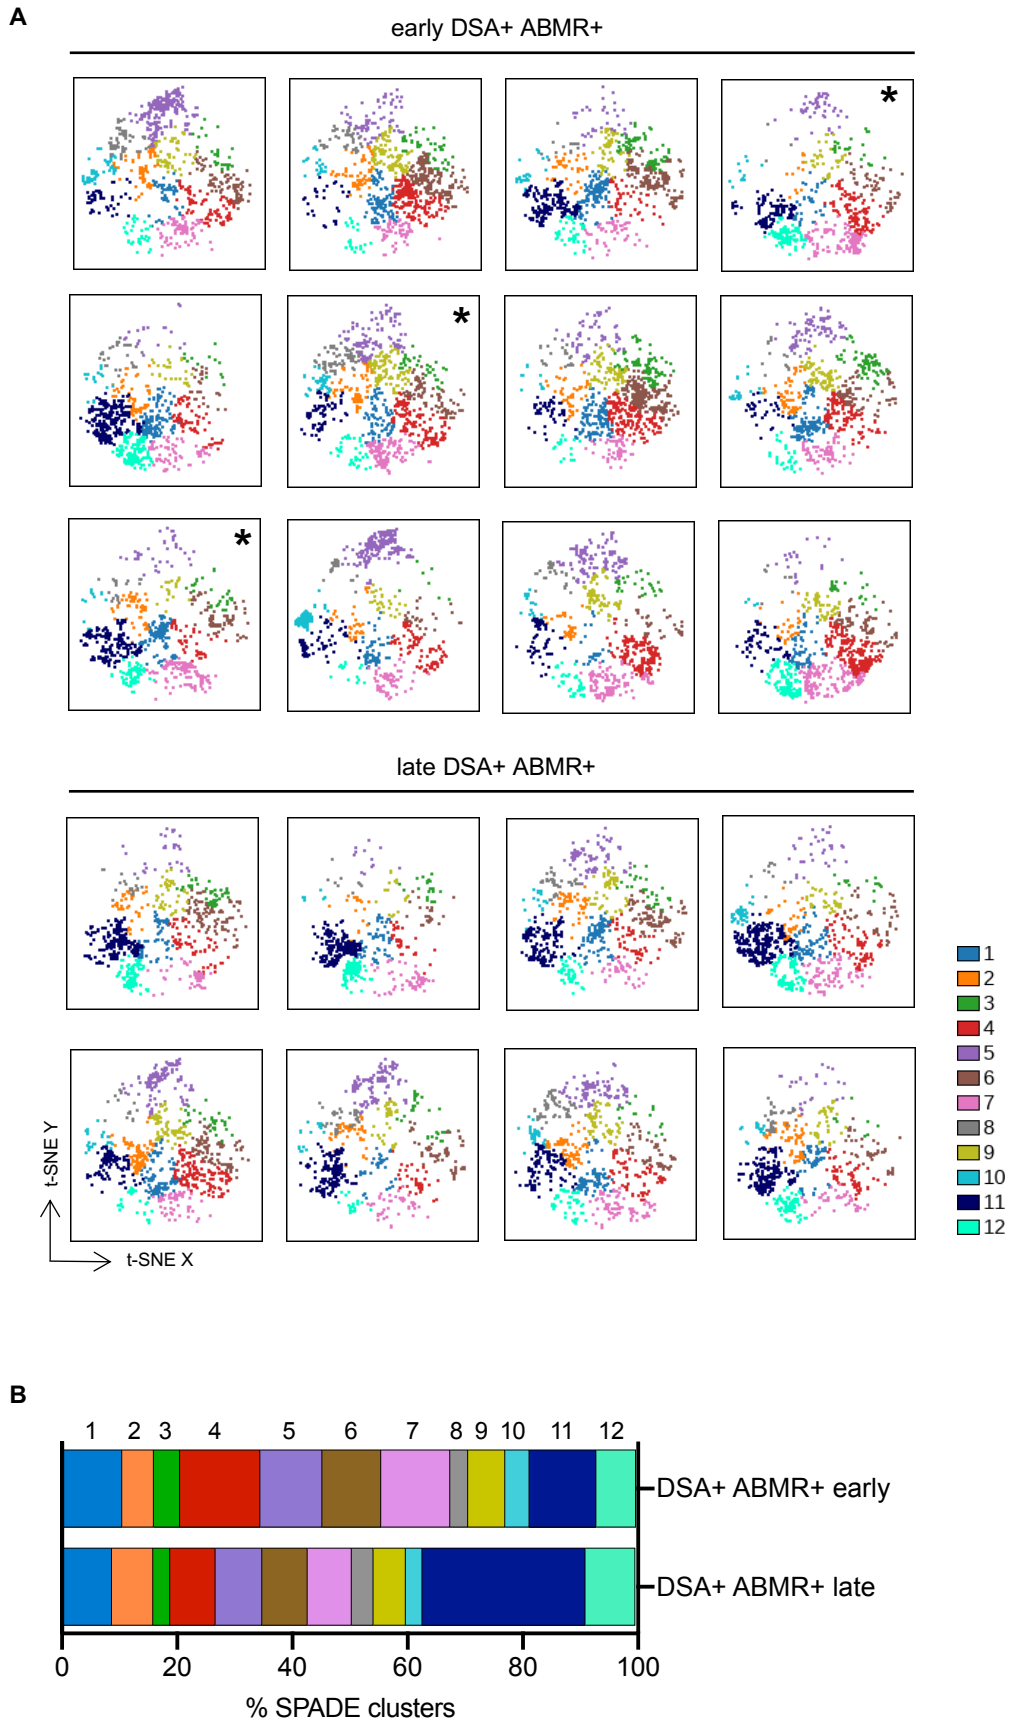

**Figure S12. High-dimensional flow cytometry analyses of MBCs in individual patients**

t-SNE projections of MBCs were overlaid with the 12 MBC clusters delineated by SPADE clustering (as in **Figure 1C**). **(A)** t-SNE maps were generated for individual patients from early DSA+ABMR+ (N=12) and late DSA+ABMR+ (N=8) groups. Each t-SNE map is based on N=990 cells. \* indicates patients with pure DSA+ABMR+. **(B)** Stacked bar plot showing the 12 MBC clusters distribution based on SPADE clustering as in panel **A**. Clusters 4 and 11 are significantly different in their proportions across the indicated groups, by Mann-Whitney U test.

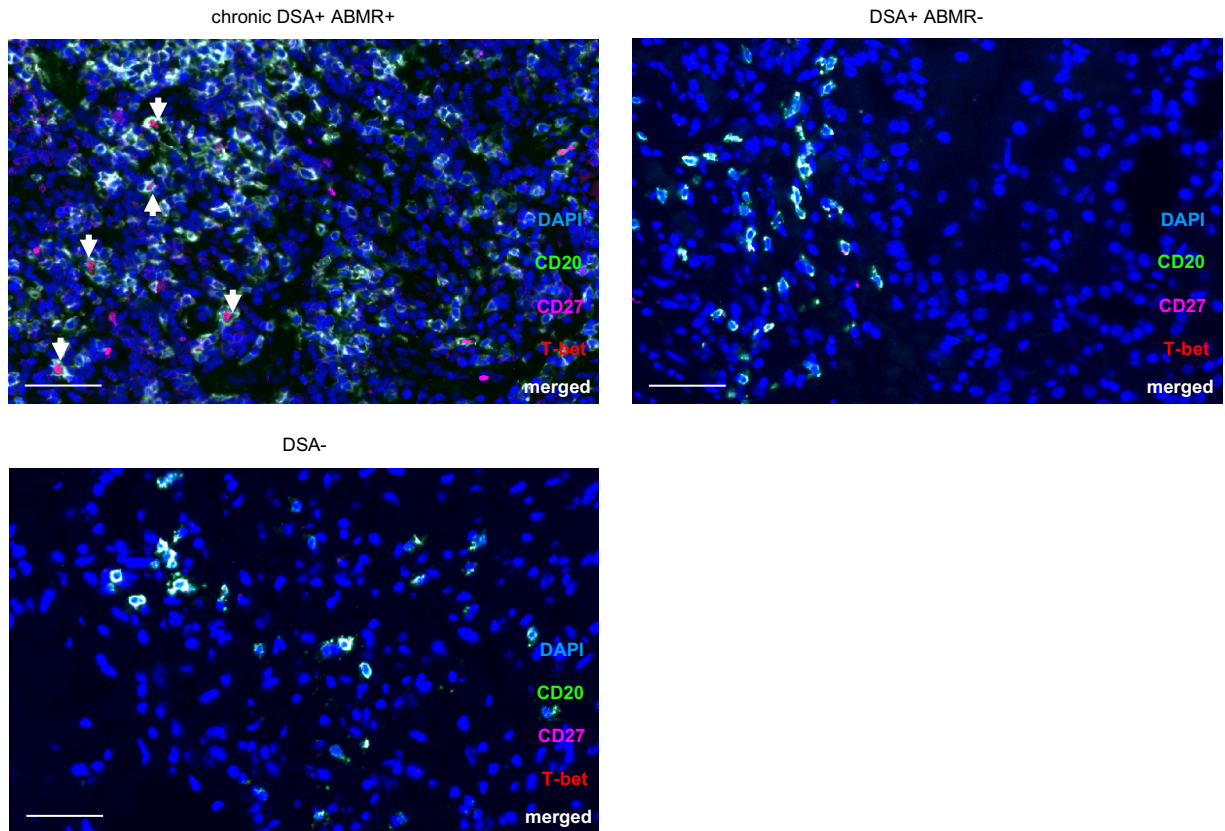

**Figure S13. AM cells within kidney allografts of different patient groups**

Representative multiplex immunofluorescence staining performed on kidney allograft biopsies from chronic DSA+ABMR+, DSA+ABMR- and DSA- patients. Each image is representative of two independent kidney allograft biopsy samples from each patient group. Stainings for chronic DSA+ABMR+ were performed on transplant explant biopsies from patients with incurable chronic DSA+ABMR+, refractory to immunosuppressive treatments. Arrows indicate CD20<sup>+</sup> CD27<sup>+</sup> T-bet<sup>+</sup> (triple-positive) cells. Scale bars indicate 50µm.

**A**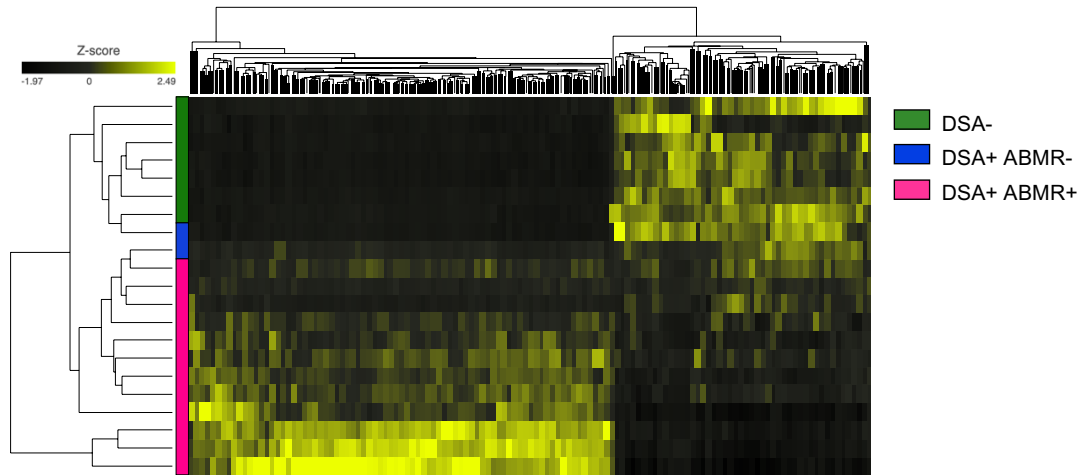**B**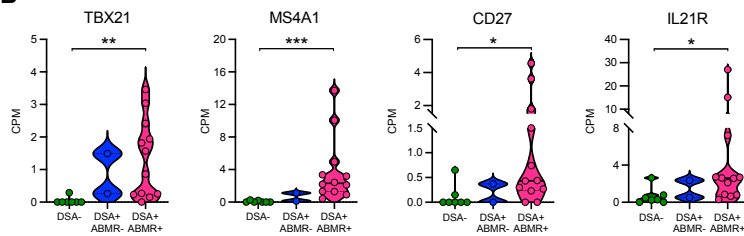

**Figure S14. Molecular signatures of AM subsets within kidney allografts of patients**

RNA-seq analysis of kidney allograft biopsies from 21 patients was performed; DSA- (N=7), DSA+ABMR- (N=2) and DSA+ABMR+ (N=12). **(A)** Heatmap generated by hierarchical clustering of genes and the three types of patient samples is displayed. Genes used for clustering were differentially expressed (fold change >2, false discovery rate P-Value <0.05). **(B)** Violin plots showing the expression levels of selected AM-specific genes from indicated patient groups. CPM, counts per million. Kruskal-Wallis with Dunn's post-test. \*P < 0.05; \*\*P < 0.01; \*\*\*P < 0.001. Each dot represents one subject and horizontal lines are median values  $\pm$  SEM.

**Table S1. Patients demographics (blood samples)**

|                                                                         | HC              | DSA-                 | DSA+<br>ABMR-        | DSA+<br>ABMR+        | P<br>value**** |
|-------------------------------------------------------------------------|-----------------|----------------------|----------------------|----------------------|----------------|
|                                                                         | N=17            | N=48                 | N=28                 | N=20                 |                |
| <b>Characteristics at the time of transplantation</b>                   |                 |                      |                      |                      |                |
| Recipient age (years), mean $\pm$ SD                                    | 50.9 $\pm$ 13.1 | 49.8 $\pm$ 13.7      | 47.3 $\pm$ 14.3      | 45.3 $\pm$ 15.1      | 0.5404         |
| Recipient male sex, n(%)                                                | 6 (35.3)        | 33 (68.8)            | 16 (57.1)            | 11 (55.0)            | 0.1133         |
| Caucasian, n(%)                                                         | 16 (94.1)       | 43 (89.6)            | 26 (92.9)            | 15 (75.0)            | 0.1964         |
| Retransplantation, n(%)                                                 | –               | 3 (6.3)              | 7 (25.0)             | 8 (40.0)             | 0.0031         |
| Time in dialysis (months), mean $\pm$ SD                                | –               | 23.7 $\pm$ 29.8      | 43.6 $\pm$ 46.5      | 37.0 $\pm$ 28.8      | 0.0525         |
| <b>Native kidney disease, n(%)</b>                                      |                 |                      |                      |                      |                |
| Glomerular*                                                             | –               | 9 (18.8)             | 11 (39.3)            | 5 (25.0)             | 0.1432         |
| Hypertensive                                                            | –               | 6 (12.5)             | 2 (7.1)              | 4 (20.0)             | 0.4141         |
| Tubulointerstitial nephropathy                                          | –               | 1 (2.1)              | 3 (10.7)             | 1 (5.0)              | 0.2631         |
| Polycystic kidney disease                                               | –               | 8 (16.7)             | 5 (17.9)             | 2 (10.0)             | 0.7315         |
| Diabetes                                                                | –               | 12 (25.0)            | 3 (10.7)             | 5 (25.0)             | 0.2932         |
| Other nephropathy**                                                     | –               | 12 (25.0)            | 5 (17.9)             | 5 (25.0)             | 0.7509         |
| <b>Donor characteristics, mean <math>\pm</math> SD</b>                  |                 |                      |                      |                      |                |
| Donor age (year), mean $\pm$ SD                                         | –               | 43.5 $\pm$ 12.3      | 39.1 $\pm$ 15.3      | 39.4 $\pm$ 13.7      | 0.3177         |
| Donor male sex, n(%)                                                    | –               | 21 (43.8)            | 16 (57.1)            | 10 (50.0)            | 0.5272         |
| Living donor, n(%)                                                      | –               | 25 (52.1)            | 11 (39.3)            | 5 (25.0)             | 0.1096         |
| <b>Cold ischemia time (min), mean <math>\pm</math> SD</b>               |                 |                      |                      |                      |                |
|                                                                         | –               | 310.1 $\pm$<br>368.8 | 465.3 $\pm$<br>398.0 | 417.5 $\pm$<br>299.3 | 0.1795         |
| Thymoglobulin induction therapy, n(%)                                   | –               | 48 (100)             | 28 (100)             | 20 (100)             | –              |
| Negative flow cytometry crossmatch, n(%)                                | –               | 48 (100)             | 28 (100)             | 20 (100)             | –              |
| HLA mismatches (number), mean $\pm$ SD***                               | –               | 5.0 $\pm$ 2.0        | 5.3 $\pm$ 1.9        | 5.0 $\pm$ 2.1        | 0.8571         |
| DSA present before transplantation, n(%)                                | –               | 0 (0)                | 11 (39.3)            | 12 (60.0)            | <0.0001        |
| <b>Characteristics at the time of cross-sectional sample collection</b> |                 |                      |                      |                      |                |
| Time to transplantation (months), mean $\pm$ SEM                        | –               | 4.5 $\pm$ 0.4        | 3.8 $\pm$ 0.7        | 5.3 $\pm$ 1.4        | 0.4668         |
| Tacrolimus, n(%)                                                        | –               | 48 (100)             | 27 (96.4)            | 18 (90.0)            | 0.0959         |
| Tacrolimus trough level ( $\mu$ g/L), mean $\pm$ SD                     | –               | 9.5 $\pm$ 3.1        | 9.3 $\pm$ 2.9        | 8.8 $\pm$ 5.3        | 0.7336         |
| Mycophenolate mofetil, n(%)                                             | –               | 48 (100)             | 28 (100)             | 20 (100)             | –              |

ABMR, antibody-mediated rejection ; DSA, donor-specific antibody ; HLA, human leukocyte antigen ; TCMR, T-cell mediated rejection

\*Glomerulopathies includes chronic glomerulonephritis, crescentic glomerulonephritis, focal segmental glomerulosclerosis, Wegener's granulomatosis, IgA nephropathy, membranous nephropathy

\*\*other nephropathy includes familial nephropathy, renal hypoplasia and other noncategorized conditions

\*\*\*HLA mismatches at A, B, DR and DQ locus

\*\*\*\*One-way ANOVA and chi-squared test were used for statistical comparison of continuous and categorical variables, respectively

**Table S2. Assay table and blood sample sizes**

|                                   | HC | DSA- | DSA+<br>ABMR- | DSA+<br>ABMR+ | total |
|-----------------------------------|----|------|---------------|---------------|-------|
| <b>PBMC profiling</b>             |    |      |               |               |       |
| B cell 21-color flow cytometry    | 17 | 48   | 28            | 20            | 113   |
| T cell 22-color flow cytometry    | 17 | 48   | 28            | 20            | 113   |
| MBC RNA-seq                       | –  | 3    | 3             | 3             | 9     |
| T <sub>FH</sub> /MBC co-cultures  | 4  | 3    | 3             | 7             | 17    |
| B cell activation <i>in vitro</i> | 8  | –    | –             | –             | 8     |
| <b>Serum profiling</b>            |    |      |               |               |       |
| DSA MFI, class, specificity       | –  | –    | 28            | 20            | 48    |
| DSA C1q-binding                   | –  | –    | 23            | 19            | 42    |
| DSA IgG subclasses                | –  | –    | 18            | 18            | 36    |

MBC, memory B cells; T<sub>FH</sub>, T follicular helper cells; MFI, mean fluorescence intensity

**Table S3. Memory B cell clusters and phenotypic patterns**

| cluster   | markers                                                         | IL-21R expression | isotype switching | proliferation | mB subset |
|-----------|-----------------------------------------------------------------|-------------------|-------------------|---------------|-----------|
| <b>1</b>  | CD21+ CD24+ CD27+ CXCR5+ IgD+                                   | No                | unswitched        | No            | RM        |
| <b>2</b>  | CD21+ CD24+ CXCR5+ IgD+ CD27+/-                                 | No                | unswitched        | No            | RM        |
| <b>3</b>  | CD21+ CD24+ CD38+ CXCR5+ IgD+ CD27+ CD86+                       | No                | unswitched        | No            | RM        |
| <b>4</b>  | CD21+/- CD24+ CD38+ CXCR5+ IgD- CD27+ CD86+                     | No                | switched          | No            | AM        |
| <b>5</b>  | CD21+ IL21R+ CD24+ CD38+ CXCR5+ IgD+ CD27- CD86+ CD95+ Ki67+    | Yes               | unswitched        | Yes           | RM        |
| <b>6</b>  | CD21+ CD24+ CD38+ CXCR5+ IgD- CD27+/-                           | No                | switched          | No            | RM        |
| <b>7</b>  | T-bet+ CD11c+ CD21+/- CD24- CD38+ CXCR5+ IgD- CD27+ CD86+ Ki67+ | No                | switched          | Yes           | AM        |
| <b>8</b>  | CD21+ CD24+ CD38+ CXCR5+ IgD+ CD27- CD86+                       | No                | unswitched        | No            | RM        |
| <b>9</b>  | CD21+ CD24+ CD38+ CXCR5+ IgD+ CD27-                             | No                | unswitched        | No            | RM        |
| <b>10</b> | CD21+ CD24+/- CD38+ CXCR5+ IgD+ CD27- IL6R+                     | No                | unswitched        | No            | RM        |
| <b>11</b> | T-bet+ CD11c+ CD19+ CD20+ CD21- IL21R+ IgD+ CD27+/- CD86+ Ki67+ | Yes               | unswitched        | Yes           | AM, TLM   |
| <b>12</b> | T-bet+ CD11c+ CD19+ CD20+ CD21- IL21R+ IgD- CD27+/- CD86+ CD95+ | Yes               | switched          | No            | AM, TLM   |

Isotype switching was defined according to expression of IgD

Proliferation was defined according to expression of Ki67

Resting (RM), activated (AM) and tissue-like memory (TLM) were identified according to expression of CD21, CD27 and T-bet

**Table S4. GO pathways significantly upregulated in AM versus RM subset in DSA+ABMR+ group**

| GO ID      | GO Term                                       | -log (Pvalue) | genes                                                                                                                                                                                                                                                                                                                |
|------------|-----------------------------------------------|---------------|----------------------------------------------------------------------------------------------------------------------------------------------------------------------------------------------------------------------------------------------------------------------------------------------------------------------|
| GO:0006898 | receptor-mediated endocytosis                 | 9.25          | MARCO, SCARF1, APOB, CTTN, TF, VEGFA, SPARC, PIKFYVE, AAK1, CLU, SAG, JCHAIN, SYT11, CD36, DAB2, ALB, SYK, HSP90B1, CXCL8, LDLRAD3, CXCR2, ITSN2, MIR27A, IGKV3D-20, IGLV1-51, IGLV2-23, IGHV3-7, IGHV3-53, IGKV2D-30, IGKV1D-33, IGKV1-17, IGKV2-28, MRC1, IGHV2-70                                                 |
| GO:0051256 | mitotic spindle midzone assembly              | 4.39          | KIF4A, KIF23, AURKB, PRC1                                                                                                                                                                                                                                                                                            |
| GO:0007094 | mitotic spindle assembly checkpoint           | 4.33          | MAD1L1, TPR, CENPF, TEX14, BUB1B, GEN1, AURKB                                                                                                                                                                                                                                                                        |
| GO:0000281 | mitotic cytokinesis                           | 4.23          | ANLN, KIF4A, ECT2, ESPL1, NUSAP1, KIF23, KIF20B, JTB, ANK3, PRC1                                                                                                                                                                                                                                                     |
| GO:0051301 | cell division                                 | 4.07          | MAD1L1, ANLN, TPR, ASPM, SPAG5, TPX2, KIF4A, KIF3B, VEGFA, ECT2, CENPF, ESRRB, TEX14, ZWINT, E2F8, ESPL1, NUSAP1, KIF23, KNL1, CUZD1, KIF20B, FGF2, CENPE, LEF1, KIF2C, JTB, CDCA5, ANK3, BUB1B, CDC25C, SPC24, SPICE1, CDC25A, ANAPC10, CDK5, E2F7, CCNE2, AURKB, MACC1, KIF18B, PDGFA, PRC1, SPOUT1, SPIRE2, KIFC1 |
| GO:0050900 | leukocyte migration                           | 4.03          | CD84, APOB, DDT, VEGFA, PIKFYVE, FN1, IL1R1, CSF3R, SDC4, GPR18, JCHAIN, ITGAX, S100A8, PLA2G7, JAML, NLRP3, S100A9, F2RL1, SYK, CXCL8, OLR1, UMODL1, CXCR2, DPP4, IGKV3D-20, IGLV1-51, IGLV2-23, IGHV3-7, IGHV3-53, IGKV2D-30, IGKV1D-33, IGKV1-17, IGKV2-28, IGHV2-70                                              |
| GO:0016446 | somatic hypermutation of immunoglobulin genes | 3.44          | POLQ, SAMHD1, AICDA, EXO1                                                                                                                                                                                                                                                                                            |
| GO:0002377 | immunoglobulin production                     | 3.39          | POLQ, SAMHD1, AICDA, FGL2, FCRL3, IL7R, EXO1, CD28, IGKV3D-20, IGKV3D-11, IGLV5-52, IGLV1-51, IGLV2-23, IGKV3D-7, IGKV2D-30, IGKV1D-33, IGKV1-17, IGKV2-28, IGKV1-27                                                                                                                                                 |
| GO:0050853 | B cell receptor signaling pathway             | 3.30          | ITK, FOXP1, GPS2, FCRL3, MNDA, CTLA4, SYK, IGHV3-7, IGHV3-20, IGHV3-53, IGHV3-66, IGHV2-70                                                                                                                                                                                                                           |

**Table S5. GO pathways significantly upregulated in TLM versus RM subset in DSA+ABMR+ group**

| GO ID      | GO Term                                                   | -log (Pvalue) | genes                                                                                                                                                                                                                                                                                                                                                                                                                                                                                                                                                                                                                                                                                                                                                                                                                                                                                                      |
|------------|-----------------------------------------------------------|---------------|------------------------------------------------------------------------------------------------------------------------------------------------------------------------------------------------------------------------------------------------------------------------------------------------------------------------------------------------------------------------------------------------------------------------------------------------------------------------------------------------------------------------------------------------------------------------------------------------------------------------------------------------------------------------------------------------------------------------------------------------------------------------------------------------------------------------------------------------------------------------------------------------------------|
| GO:0007155 | cell adhesion                                             | 5.53          | BAIAP2L1, FARP2, TENM1, SLAMF7, VCAN, CD84, TRO, CBF, ADGRL1, FCGR2B, TBX21, SCARF1, KIFAP3, GPC4, ACTN2, CTTN, CASS4, NRCAM, SEMA6A, JAK2, GRAP2, HCK, JAG1, PTPRS, SIGLEC6, HSPB1, CNTNAP3, MAP3K8, CRTAM, FOLR3, TRPV4, CLEC4A, SMOC2, BCL6, HHLA2, ADAM23, ZAP70, SLAMF1, KIF14, NRP2, CTGF, CTNNAL1, NR4A3, CSF3R, ADGRE5, CDH26, SOX4, WNT1, MACF1, PALLD, THEMIS2, LILRB2, VSTM2L, VAV3, PTPN22, DTX1, CD36, CD164, PLXNC1, THSD1, CD72, LRRC32, THBS1, ENTPD1, LEF1, ITGAX, SKAP1, S100A8, RHOB, HSPD1, BOC, LPP, TNFRSF21, PARD3, FEZ1, ANK3, MAGI, PTPRO, DST, UBASH3B, JAM2, PCDH1, ITGAD, SPON2, ITGB2, DISC1, FBLN2, CD200R1, SYK, INPPL1, SERPINB8, IL12A, EFNA1, PTK2, CXCL, LIMS1, MTSS1, FPR2, RASGRP1, PTPRM, SUSD5, PTPN2, ZNF645, CDK5R1, EPHB3, CADM1, ZNF703, PCDH9, GP1BA, GCNT1, NTNG2, DPP4, PDCD1LG2, DLL1, PPP1CB, PLXNA4, PCDHGC3, PCDHGC4, PCDHGA11, PCDHGB1, PCDHGA4, SRGAP2 |
| GO:0006897 | endocytosis                                               | 3.88          | FGR, HEATR5B, PIK3C2A, SLC11A1, NCKAP1, SYT1, RAB27A, FCGR2B, SCARF1, DGKD, CTTN, SNX5, GRK3, RIN3, HCK, EEA1, EHD4, CLIP3, CEACAM4, SPARC, PIKFYVE, AAK1, SLAMF1, ESYT2, RHOQ, CLU, TMEM175, HEATR5A, SNX9, SAG, SYT11, VAV3, CD36, SDCBP, TMPRSS13, THBS1, BMP2K, MTMR6, STON2, FCGR2A, ACKR2, LRRTM2, RABGAP1L, DAB2, RABGEF1, SPON2, ITGB2, CD3G, NOSTRIN, SYK, INPPL1, LRP1B, PTK2, CXCL8, REPS2, FPR2, MCTP1, SNX18, LDLRAD3, APOBR, CLN3, LRRK2, MYO6, ITSN2, DLL1, INPP5F, IGLV6-57, IGHD, IGHV3-11, IGHV3-20, IGHV2-26, TXNDC5, IGKV2D-30, IGKV1D-33, CD302, STON1, IGLL5, XKR, IGHV2-70, IGHV4-4                                                                                                                                                                                                                                                                                                 |
| GO:0032466 | negative regulation of cytokinesis                        | 3.76          | TEX14, E2F8, E2F7, AURKB                                                                                                                                                                                                                                                                                                                                                                                                                                                                                                                                                                                                                                                                                                                                                                                                                                                                                   |
| GO:0043087 | regulation of GTPase activity                             | 3.67          | RTN4R, RAP1GAP, GPR137B, RAPGEF3, RGS1, RIN3, ARHGEF10, ADAP1, BCL6, ECT2, RGS2, MKKS, DOCK4, CHN1, SNX9, VAV3, PLXNC1, SPRY2, BCAR3, FGD4, GPR65, IQGAP2, ARHGAP18, RGS18, RABGAP1L, RASGRP3, RANBP2, AGAP1, RAPGEF6, GPSM1, PTK2, LIMS1, RASGRP1, NET1, SNX18, EPHB3, RGD6, IQGAP3, ADAP2, LRRK2, SRGAP1, SIPA1L1, ARHGAP11A, PLXNA4, ARFGAP3, SRGAP2                                                                                                                                                                                                                                                                                                                                                                                                                                                                                                                                                    |
| GO:0050855 | regulation of B cell receptor signaling pathway           | 3.42          | PRKCH, CBF, FCGR2B, PTPN22, CMTM3, FCRL3, CD19                                                                                                                                                                                                                                                                                                                                                                                                                                                                                                                                                                                                                                                                                                                                                                                                                                                             |
| GO:0050919 | negative chemotaxis                                       | 3.35          | SEMA6A, NRP2, NRG1, SEMA4C, SLIT1, SEMA4A, PDGFA, DPP4, PLXNA4                                                                                                                                                                                                                                                                                                                                                                                                                                                                                                                                                                                                                                                                                                                                                                                                                                             |
| GO:0000122 | negative regulation of transcription by RNA polymerase II | 3.18          | ZBTB32, TPR, PER3, PRDM1, CBF, MEF2A, TP63, TBX21, FGFR1, RBL1, ATRX, DNMT3B, NFATC2, TFEC, AEBP1, KLF3, TRPV4, BCL6, DLX2, NR4A3, DNMT3A, MXI1, BATF3, ATXN1, SIX1, SMO, E2F8, ZMYM5, MEIS2, CD36, PRDM5, LEF1, PRDM16, HMBOX1, NR6A1, WWC2, DAB2, NR4A2, JAZF1, BACH1, IRX6, TAL1, GF11, DACT1, E2F7, ZNF608, EFNA1, ZEB2, WNT10B, CHD3, BPTF, PARP15, HOXB2, PTPN2, MAF, AURKB, HES7, MITF, PEG3, ZNF254, OTUD7B, UHRF1                                                                                                                                                                                                                                                                                                                                                                                                                                                                                 |

|            |                                                                               |      |                                            |
|------------|-------------------------------------------------------------------------------|------|--------------------------------------------|
| GO:0033262 | regulation of nuclear cell cycle DNA replication                              | 2.99 | FGFR1, ATRX, AICDA, BCL6, TERF1            |
| GO:0000083 | regulation of transcription involved in G1/S transition of mitotic cell cycle | 2.97 | CDK14, ORC1, CDC6, BACH1, GF11, E2F7, RRM2 |

**Table S6. V<sub>H</sub> germ line genes differentially expressed in blood and allografts of DSA+ABMR- versus DSA- group**

| Gene Symbol | P Value (DSA+ ABMR- vs DSA-) |              |                    |                           |
|-------------|------------------------------|--------------|--------------------|---------------------------|
|             | Blood<br>(N=3 vs N=3)        |              |                    | Allograft<br>(N=2 vs N=7) |
|             | RM                           | AM           | TLM                |                           |
| IGHV1-3     | 0.703                        | 0.908        | 0.352              | 1.000                     |
| IGHV1-69    | 0.281                        | 1.000        | 0.201              | 1.000                     |
| IGHV3-11    | 0.077                        | 0.818        | 0.288              | 1.000                     |
| IGHV3-15*   | 0.725                        | 0.543        | 0.999              | 1.000                     |
| IGHV3-20    | 0.814                        | 0.275        | 0.400              | 1.000                     |
| IGHV3-23*   | 0.393                        | 0.409        | 0.573              | 1.000                     |
| IGHV3-53    | 0.372                        | <b>0.037</b> | 0.667              | 1.000                     |
| IGHV3-64D   | 0.621                        | 0.173        | 0.706              | 1.000                     |
| IGHV3-7*    | 0.773                        | 0.189        | 0.688              | 0.444                     |
| IGHV3-74*   | 0.923                        | 0.257        | 0.203              | 1.000                     |
| IGHV4-34    | 0.763                        | <b>0.007</b> | 0.005 <sup>#</sup> | 1.000                     |
| IGHV4-39    | 0.293                        | 0.471        | 0.339              | 1.000                     |
| IGHV4-4     | 0.543                        | 0.902        | 0.157              | 1.000                     |
| IGHV4-55    | <b>0.034</b>                 | 0.822        | 0.705              | 1.000                     |
| IGHV4-59    | 0.773                        | 0.964        | 0.120              | 0.444                     |
| IGHV5-78    | 0.168                        | 0.692        | 0.033 <sup>#</sup> | 1.000                     |

P values in bold are those of significantly upregulated genes in DSA+ABMR- versus DSA- group

\* indicates IGHV genes previously reported to be involved in organ rejection<sup>33, 34</sup>

<sup>#</sup> indicates P values for significantly downregulated genes in DSA+ABMR- versus DSA- group

**Table S7. Patients demographics (allograft biopsy samples)**

|                                                                         | DSA-              | DSA+<br>ABMR-     | DSA+<br>ABMR+     | P value**** |
|-------------------------------------------------------------------------|-------------------|-------------------|-------------------|-------------|
|                                                                         | N=7               | N=2               | N=12              |             |
| <b>Characteristics at the time of transplantation</b>                   |                   |                   |                   |             |
| Recipient age (years), mean $\pm$ SD                                    | 50.6 $\pm$ 11.3   | 53.5 $\pm$ 3.5    | 42.8 $\pm$ 12.8   | 0.2867      |
| Recipient male sex, n(%)                                                | 5 (71.4)          | 1 (50.0)          | 6 (60.0)          | 0.646       |
| Caucasian, n(%)                                                         | 4 (57.1)          | 2 (100)           | 10 (83.3)         | 0.307       |
| Retransplantation, n(%)                                                 | 2 (28.6)          | 1 (50.0)          | 3 (25.0)          | 0.769       |
| Time in dialysis (months), mean $\pm$ SD                                | 8.1 $\pm$ 19.0    | 20.5 $\pm$ 16.3   | 53.2 $\pm$ 43.2   | 0.045       |
| Native kidney disease, n(%)                                             |                   |                   |                   |             |
| Glomerular*                                                             | 0 (0)             | 1 (50.0)          | 5 (41.7)          | 0.119       |
| Hypertensive                                                            | 1 (14.3)          | 0 (0)             | 2 (16.7)          | 0.823       |
| Tubulointerstitial nephropathy                                          | 0 (0)             | 0 (0)             | 0 (0)             | –           |
| Polycystic kidney disease                                               | 0 (0)             | 1 (50)            | 0 (0)             | 0.007       |
| Diabetes                                                                | 0 (0)             | 0 (0)             | 1 (8.3)           | 0.675       |
| Other nephropathy**                                                     | 6 (85.7)          | 0 (0)             | 4 (33.3)          | 0.032       |
| Donor age (year), mean $\pm$ SD                                         | 48.2 $\pm$ 15.3   | 37.0 $\pm$ 5.7    | 44.4 $\pm$ 9.1    | 0.476       |
| Donor male sex, n(%)                                                    | 2 (28.6)          | 1 (50.0)          | 6 (50.0)          | 0.646       |
| Living donor, n(%)                                                      | 5 (71.4)          | 1 (50.0)          | 2 (16.7)          | 0.056       |
| Cold ischemia time (min), mean $\pm$ SD                                 | 358.0 $\pm$ 514.5 | 331.0 $\pm$ 425.7 | 407.8 $\pm$ 203.6 | 0.933       |
| Thymoglobulin induction therapy, n(%)                                   | 7 (100)           | 2 (100)           | 12 (100)          | –           |
| Negative flow cytometry crossmatch, n(%)                                | 7 (100)           | 2 (100)           | 12 (100)          | –           |
| HLA mismatches (number), mean $\pm$ SD***                               | 4.3 $\pm$ 2.9     | 5.0 $\pm$ 1.4     | 4.8 $\pm$ 1.7     | 0.848       |
| <b>Characteristics at the time of cross-sectional sample collection</b> |                   |                   |                   |             |
| Time to transplantation (months), mean $\pm$ SEM                        | 5.4 $\pm$ 1.7     | 7.6 $\pm$ 4.5     | 14.3 $\pm$ 4.5    | 0.338       |
| TCMR lesions at the time of sample collection, n(%)                     | 0 (0)             | 0 (0)             | 11 (91.6)         | 0.0002      |
| Tacrolimus, n(%)                                                        | 7 (100)           | 2 (100)           | 11 (91.7)         | 0.675       |
| Tacrolimus trough level ( $\mu$ g/L), mean $\pm$ SD                     | 8.2 $\pm$ 2.6     | 11.4 $\pm$ 2.5    | 8.9 $\pm$ 4.2     | 0.565       |
| Mycophenolate mofetil, n(%)                                             | 7 (100)           | 2 (100)           | 11 (91.7)         | 0.675       |

ABMR, antibody-mediated rejection ; DSA, donor-specific antibody ; HLA, human leukocyte antigen ; TCMR, T-cell mediated rejection

\*Glomerulopathies includes chronic glomerulonephritis, crescentic glomerulonephritis, focal segmental glomerulosclerosis, Wegener's granulomatosis, IgA nephropathy, membranous nephropathy

\*\*other nephropathy includes familial nephropathy, renal hypoplasia and other noncategorized conditions

\*\*\*HLA mismatches at A, B, DR and DQ locus

\*\*\*\*One-way ANOVA and chi-squared test were used for statistical comparison of continuous and categorical variables, respectively

**Table S8. Antibodies for flow cytometry**

| Marker | Dye              | Clone     | Source         |
|--------|------------------|-----------|----------------|
| Blimp1 | AF647            | 6D3       | BD Biosciences |
| CD11c  | BV510            | B-ly6     | BD Biosciences |
| CD19   | APC-eFluor 780   | SJ25C1    | Invitrogen     |
| CD20   | BV570            | 2H7       | Biolegend      |
| CD21   | APC              | Bu32      | Biolegend      |
| CD24   | BV605            | ML5       | BD Biosciences |
| CD27   | PE-Cy7           | O323      | Invitrogen     |
| CD3    | BV750            | SK7       | Biolegend      |
| CD3    | BV510            | SK7       | Biolegend      |
| CD32   | BV605            | FLI8.26   | BD Biosciences |
| CD38   | PE-CF594         | HIT2      | BD Biosciences |
| CD4    | BV605            | RPA-T4    | BD Biosciences |
| CD40   | BV510            | 5C3       | BD Biosciences |
| CD45RO | BV570            | UCHL1     | Biolegend      |
| CD71   | PE               | CY1G4     | Biolegend      |
| CD72   | BV711            | J4-117    | BD Biosciences |
| CD86   | PE-Cy5           | IT2.2     | Biolegend      |
| CD95   | PerCP-Cy5.5      | DX2       | BD Biosciences |
| CXCR3  | AF700            | 1C6/CXCR3 | BD Biosciences |
| CXCR5  | AF488            | RF8B2     | BD Biosciences |
| FcRL5  | PE               | 509F6     | BD Biosciences |
| ICOS   | PerCP-eFluor 710 | ISA-3     | Invitrogen     |
| IgD    | BV421            | IA6-2     | BD Biosciences |
| IL-21R | BV786            | 17A12     | BD Biosciences |
| IL-6R  | BB515            | M5        | BD Biosciences |
| IRF4   | eFluor 450       | 3E 4      | Invitrogen     |
| IRF8   | PerCP-eFluor 710 | V3GYWCH   | Invitrogen     |
| Ki67   | BV480            | B56       | BD Biosciences |
| PD-1   | BV650            | EH12.1    | BD Biosciences |
| T-bet  | PE               | 4B10      | BD Biosciences |
